# Supplementary material for: Pesticide Methoxychlor Promotes the Epigenetic Transgenerational Inheritance of Adult-Onset Disease through the Female Germline
Source: PubMed Central journal article supplement (PMC4109920; doi:10.1371/journal.pone.0102091), 2014-07-24

Supplemental Figure S1

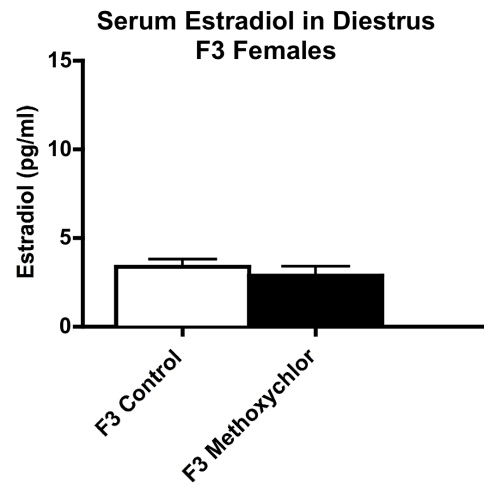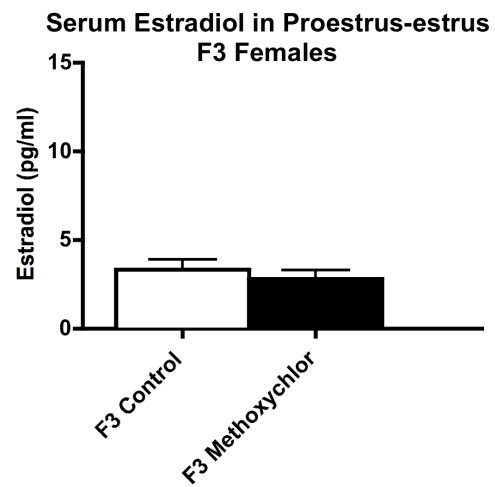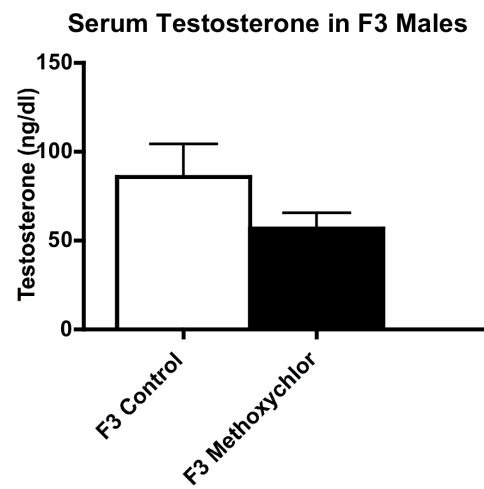

Supplement: pone.0102091.s001.pdf [file pone.0102091.s001.pdf]
