# Supplementary material for: Pesticide Methoxychlor Promotes the Epigenetic Transgenerational Inheritance of Adult-Onset Disease through the Female Germline
Source: PubMed Central journal article supplement (PMC4109920; doi:10.1371/journal.pone.0102091), 2014-07-24
Supplement: pone.0102091.s004.pdf [file pone.0102091.s004.pdf]

## Supplemental Table S1

### A

| Generation | Treatment    | Sex | Body Weight (grams) | Ovaries (% BW)     | Uterus (% BW)      | Kidney (% BW)        |
|------------|--------------|-----|---------------------|--------------------|--------------------|----------------------|
| F1         | Control      | F   | 323.0<br>± 6.67     | 0.0492<br>± 0.0012 | 0.2832<br>± 0.0191 | 0.3289<br>± 0.0054   |
| F1         | Methoxychlor | F   | 318.3<br>± 6.31     | 0.0486<br>± 0.0021 | 0.2847<br>± 0.0268 | 0.3523**<br>± 0.0083 |
| F3         | Control      | F   | 289.3<br>± 5.01     | nd                 | nd                 | nd                   |
| F3         | Methoxychlor | F   | 288.9<br>± 4.32     | nd                 | nd                 | nd                   |

Body Weight and organ weights in F1 and F3 generation female rats of Control and Methoxychlor lineages (mean ± standard error). Asterisks (\*, \*\*, \*\*\*), if present, indicate statistically significant differences between means of Control and Methoxychlor lineages (P<0.05, P<0.01 and P<0.001 respectively); nd = not determined.

### B

| Generation | Treatment    | Sex | Body Weight (grams) | Testis (% BW)        | Prostate (% BW)    | Seminal Vesicle (% BW) | Epididymis (% BW)  | Kidney (% BW)       |
|------------|--------------|-----|---------------------|----------------------|--------------------|------------------------|--------------------|---------------------|
| F1         | Control      | M   | 567.2<br>± 6.83     | 0.7799<br>± 0.0127   | 0.1943<br>± 0.0078 | 0.0835<br>± 0.0020     | 0.2566<br>± 0.0037 | 0.3415<br>± 0.0077  |
| F1         | Methoxychlor | M   | 551.9<br>± 8.90     | 0.7017**<br>± 0.0193 | 0.1838<br>± 0.0085 | 0.0812<br>± 0.0036     | 0.2553<br>± 0.0058 | 0.3738*<br>± 0.0110 |
| F3         | Control      | M   | 513.7<br>± 8.79     | nd                   | nd                 | nd                     | nd                 | nd                  |
| F3         | Methoxychlor | M   | 522.7<br>± 7.11     | nd                   | nd                 | nd                     | nd                 | nd                  |

Body weight (grams) and organ weights (% of body weight) in F1 and F3 generation male rats of Control and Methoxychlor lineages (mean ± standard error). Asterisks (\*, \*\*), if present, indicate statistically significant differences between means of Control and Methoxychlor lineages (P<0.05, P<0.01 respectively); nd = not determined.
