# Supplementary material for: Pesticide Methoxychlor Promotes the Epigenetic Transgenerational Inheritance of Adult-Onset Disease through the Female Germline
Source: PubMed Central journal article supplement (PMC4109920; doi:10.1371/journal.pone.0102091), 2014-07-24
Supplement: pone.0102091.s005.pdf [file pone.0102091.s005.pdf]

## Supplemental Table S2

### A. Individual disease incidence in F1 generation female rats of Control and Methoxychlor lineages.

| Serial Number | Rat ID      | Puberty | Ovary | Uterus | Kidney | Obesity | Tumor | Total Disease |
|---------------|-------------|---------|-------|--------|--------|---------|-------|---------------|
| C1            | MCTT2-1-1-1 | -       |       | -      | -      | -       | -     |               |
| C2            | MCTT2-1-1-2 | -       |       | +      | -      | -       | -     | 1             |
| C3            | MCWW0-1-2-1 | -       |       | -      |        | -       | +     | 1             |
| C4            | MCWW0-1-2-2 | -       | -     | -      | -      | -       | -     |               |
| C5            | MCWW0-1-2-3 | -       | -     | -      | -      | -       | -     |               |
| C6            | MCWW0-1-2-4 | -       | -     | -      | -      | -       | -     |               |
| C7            | MCAA0-1-3-1 | -       | -     | -      | -      | -       | -     |               |
| C8            | MCAA0-1-3-2 | -       |       | -      | -      | -       | -     |               |
| C9            | MCAA0-1-3-3 | -       | -     | +      | -      | -       | -     | 1             |
| C10           | MCAA0-1-3-4 | -       |       | +      | -      | -       | -     | 1             |
| C11           | MCGG1-1-4-1 | -       | -     | -      | -      | +       | -     | 1             |
| C12           | MCGG1-1-4-2 | -       | -     | -      |        | +       | -     | 1             |
| C13           | MCGG1-1-4-3 | -       | -     | -      |        | -       | +     | 1             |
| C14           | MCGG1-1-4-4 | -       | -     | -      |        | -       | -     |               |
| C15           | MCWW0-1-6-1 | -       | -     | -      | -      | -       | -     |               |
| C16           | MCWW0-1-6-2 | -       |       | -      | -      | -       | -     |               |
| C17           | MCWW0-1-6-3 | -       |       | -      | -      | -       | -     |               |
| C18           | MCWW0-1-6-4 | -       |       | -      | -      | -       | -     |               |
| C19           | MCGG2-1-7-1 | -       |       | -      | -      | -       | -     |               |
| C20           | MCGG2-1-7-2 | -       |       | -      | -      | -       | -     |               |
| C21           | MCGG2-1-7-3 | -       |       | -      | -      | -       | -     |               |
| C22           | MCGG2-1-7-4 | -       |       | -      | +      | -       | -     | 1             |
| C23           | MCZZ0-1-8-1 | -       |       | -      | -      | -       | -     |               |
| C24           | MCZZ0-1-8-2 | -       |       | +      | +      | -       | -     | 2             |
| C25           | MCZZ0-1-8-3 | -       |       | -      | -      | +       | -     | 1             |
| C26           | MCZZ0-1-8-4 | -       |       | -      | -      | -       | -     |               |
| C27           | MCZZ0-1-8-5 | -       |       | -      | -      | +       | -     | 1             |
| M1            | MMKK0-1-1-1 | -       |       | +      | -      | -       | -     | 1             |
| M2            | MMKK0-1-1-2 | -       | -     | +      |        | +       | -     | 2             |
| M3            | MMKK0-1-1-3 | -       |       | -      | -      | -       | -     |               |
| M4            | MMKK0-1-1-2 | -       |       | -      | -      | -       | -     |               |
| M5            | MMKK0-1-1-4 | -       | +     | +      | +      | +       | -     | 4             |
| M6            | MMKK0-1-1-5 | -       | +     | -      | +      | +       | -     | 3             |
| M7            | MMGG2-1-2-1 | -       | -     | +      | -      | -       | -     | 1             |
| M8            | MMGG2-1-2-3 | -       | +     | -      | -      | -       | -     | 1             |
| M9            | MMGG2-1-2-4 | -       | -     | +      | -      | -       | -     | 1             |
| M10           | MMGG2-1-2-5 | -       | -     | -      | +      | -       | -     | 1             |
| M11           | MMKK0-1-3-1 | -       | +     | -      | -      | -       | -     | 1             |
| M12           | MMKK0-1-3-2 | -       | -     | -      | +      | -       | -     | 1             |
| M13           | MMKK0-1-3-3 | -       | -     | -      | -      | -       | -     |               |
| M14           | MMKK0-1-3-4 | -       |       | -      | -      | -       | -     |               |
| M15           | MMKK0-1-3-5 | -       |       | -      | +      | -       | -     | 1             |
| M16           | MMJJ0-1-4-1 | -       |       | -      | +      | -       | -     | 1             |
| M17           | MMJJ0-1-4-2 | -       |       | -      | +      | -       | -     | 1             |
| M18           | MMJJ0-1-4-3 | +       |       | -      | -      | -       | -     | 1             |
| M19           | MMJJ0-1-4-4 | +       |       | -      | -      | -       | -     | 1             |

**B. Individual disease incidence in F1 generation male rats of Control and Methoxychlor lineages.**

| Serial Number | Rat ID       | Puberty | Testis | Prostate | Kidney | Obesity | Tumor | Total Disease |
|---------------|--------------|---------|--------|----------|--------|---------|-------|---------------|
| C1            | MCTT2-1-1-6  | -       | -      | +        | -      | -       | -     | 1             |
| C2            | MCTT2-1-1-7  | -       | +      | -        | +      | -       | -     | 2             |
| C3            | MCTT2-1-1-8  | -       | +      | -        | -      | -       | -     | 1             |
| C4            | MCTT2-1-1-9  | -       | -      | -        | -      | -       | -     |               |
| C5            | MCWW0-1-2-10 | -       | -      | -        | -      | -       | -     |               |
| C6            | MCWW0-1-2-11 | -       | -      | -        | -      | -       | -     |               |
| C7            | MCAA0-1-3-6  | -       | -      | -        | +      | -       | -     | 1             |
| C8            | MCAA0-1-3-7  | -       | -      | +        | -      | -       | -     | 1             |
| C9            | MCAA0-1-3-8  | -       | -      | -        | +      | -       | -     | 1             |
| C10           | MCAA0-1-3-9  | -       | -      | -        | +      | -       | -     | 1             |
| C11           | MCGG1-1-4-5  | -       | -      | +        | -      | -       | -     | 1             |
| C12           | MCGG1-1-4-6  | -       | -      | -        | -      | -       | -     |               |
| C13           | MCGG1-1-4-7  | -       | -      | -        | +      | -       | -     | 1             |
| C14           | MCGG1-1-4-8  | -       | -      | -        | -      | -       | -     |               |
| C15           | MCWW0-1-6-7  | -       | -      | +        | -      | +       | -     | 2             |
| C16           | MCWW0-1-6-8  | -       | -      | -        | -      | -       | -     |               |
| C17           | MCWW0-1-6-9  | -       | -      | -        | -      | -       | -     |               |
| C18           | MCWW0-1-6-10 | -       | -      | -        | -      | -       | -     |               |
| C19           | MCWW0-1-6-11 | -       | -      | -        | -      | -       | -     |               |
| C20           | MCWW0-1-6-12 | -       | -      | +        | -      | -       | -     | 1             |
| C21           | MCGG2-1-7-6  | -       | -      | -        | -      | -       | -     |               |
| C22           | MCGG2-1-7-7  | -       | -      | -        | -      | -       | -     |               |
| C23           | MCGG2-1-7-8  | -       | -      | -        | -      | -       | -     |               |
| C24           | MCGG2-1-7-9  | -       | -      | -        | -      | -       | -     |               |
| C25           | MCZZ0-1-8-6  | -       | -      | -        | -      | -       | -     |               |
| C26           | MCZZ0-1-8-7  | -       | -      | -        | -      | -       | -     |               |
| C27           | MCZZ0-1-8-8  | -       | -      | -        | -      | +       | -     | 1             |
| C28           | MCZZ0-1-8-9  | -       | +      | -        | -      | +       | -     | 2             |
| C29           | MCZZ0-1-8-10 | +       | -      | +        | -      | -       | -     | 2             |
| M1            | MMKK0-1-1-6  | -       | -      | -        | +      | -       | -     | 1             |
| M2            | MMKK0-1-1-7  | -       | +      | -        | -      | -       | -     | 1             |
| M3            | MMKK0-1-1-8  | -       | +      | -        | -      | -       | -     | 1             |
| M4            | MMGG2-1-2-6  | -       | -      | -        | +      | -       | -     | 1             |
| M5            | MMGG2-1-2-7  | -       | -      | -        | +      | -       | -     | 1             |
| M6            | MMGG2-1-2-8  | +       | -      | +        | -      | -       | -     | 2             |
| M7            | MMKK0-1-3-6  | -       | -      | -        | -      | -       | -     |               |
| M8            | MMKK0-1-3-7  | -       | -      | -        | -      | -       | -     |               |
| M9            | MMKK0-1-3-8  | -       | -      | -        | +      | -       | -     | 1             |
| M10           | MMJJ0-1-4-6  | -       | -      | -        | +      | -       | -     | 1             |
| M11           | MMJJ0-1-4-7  | -       | -      | -        | +      | -       | -     | 1             |
| M12           | MMJJ0-1-4-8  | -       | +      | -        | +      | -       | -     | 2             |
