# Supplementary material for: Pesticide Methoxychlor Promotes the Epigenetic Transgenerational Inheritance of Adult-Onset Disease through the Female Germline
Source: PubMed Central journal article supplement (PMC4109920; doi:10.1371/journal.pone.0102091), 2014-07-24
Supplement: pone.0102091.s006.pdf [file pone.0102091.s006.pdf]

### Supplemental Table S3

#### A. Individual disease incidence in F3 generation female rats of Control and Methoxychlor lineages.

| Serial # | Rat ID       | Puberty | Ovary | Uterus | Kidney | Tumor | Obesity | Total Disease |
|----------|--------------|---------|-------|--------|--------|-------|---------|---------------|
| C1       | MCTT2-3-1-1  | -       | -     | -      | +      | -     | -       | 1             |
| C2       | MCTT2-3-1-2  | -       | -     | +      | -      | -     | -       | 1             |
| C3       | MCGG1-3-2-1  | +       | -     | -      | -      | -     | -       | 1             |
| C4       | MCGG1-3-2-2  | +       | -     | +      | -      | -     | -       | 2             |
| C5       | MCGG1-3-3-1  | -       | -     | -      | -      | -     | -       |               |
| C6       | MCGG1-3-3-2  | -       | -     | -      | -      | -     | -       |               |
| C7       | MCWW0-3-4-1  | -       | -     | -      | -      | -     | -       |               |
| C8       | MCWW0-3-4-2  | -       | -     | -      | -      | -     | -       |               |
| C9       | MCGG1-3-6-1  | -       | -     | -      | -      | -     | -       |               |
| C10      | MCAA0-3-7-1  | -       | -     | -      | -      | -     | -       |               |
| C11      | MCAA0-3-7-2  | -       | -     | -      | -      | -     | +       | 1             |
| C12      | MCGG2-3-8-1  | -       | -     | -      | +      | -     | -       | 1             |
| C13      | MCGG2-3-8-2  | -       | -     | -      | +      | -     | -       | 1             |
| C14      | MCTT2-3-9-1  | -       | -     | -      | +      | -     | -       | 1             |
| C15      | MCTT2-3-9-2  | -       | -     | +      | +      | -     | -       | 2             |
| C16      | MCWW0-3-10-1 | -       | -     | -      | -      | -     | -       |               |
| C17      | MCGG2-3-12-1 | -       | -     | -      | -      | -     | -       |               |
| C18      | MCGG1-3-13-1 | -       | -     | -      | -      | -     | -       |               |
| C19      | MCGG1-3-14-1 | -       | -     | +      | -      | -     | -       | 1             |
| C20      | MCGG1-3-15-1 | -       | -     | -      | -      | -     | -       |               |
| C21      | MCWW0-3-16-1 | -       | -     | -      | -      | -     | -       |               |
| C22      | MCWW0-3-16-2 | -       | -     | -      | -      | -     | -       |               |
| C23      | MCGG1-3-17-1 | -       | -     | -      | -      | -     | -       |               |
| C24      | MCAA0-3-18-1 | -       | -     | -      | -      | -     | -       |               |
| C25      | MCAA0-3-19-1 | -       | -     | +      | -      | -     | -       | 1             |
| C26      | MCAA0-3-19-2 | -       | -     | +      | -      | -     | -       | 1             |
| C27      | MCGG2-3-20-1 | -       | -     | -      | -      | -     | -       |               |
| C28      | MCAA0-3-21-1 | -       | -     | -      | -      | -     | -       |               |
| C29      | MCGG1-3-22-1 | -       | -     | -      | -      | -     | -       |               |
| M1       | MMKK0-3-1-1  | -       | +     | -      | +      | -     | -       | 2             |
| M2       | MMKK0-3-1-2  | -       | -     | -      | -      | -     | -       |               |
| M3       | MMKK0-3-2-1  | -       | +     | -      | -      | -     | -       | 1             |
| M4       | MMKK0-3-2-2  | -       | +     | -      | -      | -     | -       | 1             |
| M5       | MMGG2-3-3-1  | -       | +     | -      | +      | -     | -       | 2             |
| M6       | MMKK0-3-4-1  | -       | +     | -      | +      | -     | +       | 3             |
| M7       | MMKK0-3-5-1  | -       | -     | -      | -      | -     | -       |               |
| M8       | MMKK0-3-5-2  | -       | -     | +      | -      | -     | -       | 1             |
| M9       | MMGG2-3-6-1  | -       | -     | -      | -      | -     | -       |               |
| M10      | MMGG2-3-6-2  | -       | -     | -      | -      | -     | -       |               |
| M11      | MMKK0-3-7-1  | -       | +     | -      | +      | -     | +       | 3             |
| M12      | MMKK0-3-7-2  | -       | -     | -      | +      | -     | +       | 2             |
| M13      | MMKK0-3-8-1  | -       | +     | -      | -      | -     | -       | 1             |
| M14      | MMJJ0-3-9-1  | -       | -     | -      | +      | -     | -       | 1             |
| M15      | MMJJ0-3-9-2  | -       | -     | -      | +      | -     | -       | 1             |
| M16      | MMKK0-3-10-1 | -       | -     | -      | -      | -     | -       |               |

---

|     |              |   |   |   |   |   |   |   |
|-----|--------------|---|---|---|---|---|---|---|
| M17 | MMKK0-3-10-2 | - | + | - | - | - | - | 1 |
| M18 | MMKK0-3-11-1 | - | - | - | + | - | - | 1 |
| M19 | MMKK0-3-12-1 | - | - | - | + | - | - | 1 |
| M20 | MMKK0-3-13-1 | - | + | + | + | - | - | 3 |
| M21 | MMKK0-3-13-2 | - | + | + | + | - | - | 3 |
| M22 | MMKK0-3-13-3 | - | + | - | + | - | - | 2 |
| M23 | MMJJ0-3-14-1 | + | + | - | + | - | - | 3 |
| M24 | MMJJ0-3-14-2 | + |   | - | - | - | - | 1 |
| M25 | MMKK0-3-15-1 | - |   | - | + | - | + | 2 |
| M26 | MMKK0-3-15-2 | - | + | - | - | - | + | 2 |
| M27 | MMKK0-3-15-3 | - |   | - | + | - | + | 2 |
| M28 | MMJJ0-3-16-1 | - |   | - | + | - | + | 2 |
| M29 | MMJJ0-3-16-2 | - |   | - | + | - | - | 1 |
| M30 | MMJJ0-3-16-3 | - |   | - | - | - | + | 1 |

---

**B. Individual disease incidence in F3 generation male rats of Control and Methoxychlor lineages.**

| Serial # | Rat ID        | Puberty | Testis | Prostate | Kidney | Tumor | Obesity | Total Disease |
|----------|---------------|---------|--------|----------|--------|-------|---------|---------------|
| C1       | MCTT2-3-1-5   | -       | -      | -        | -      | -     | -       |               |
| C2       | MCTT2-3-1-6   | -       | -      | -        | -      | -     | -       |               |
| C3       | MCGG1-3-2-10  | -       | -      | -        | -      | -     | -       |               |
| C4       | MCGG1-3-2-11  | -       | -      | -        | -      | -     | -       |               |
| C5       | MCGG1-3-3-6   | -       | +      | -        | -      | -     | -       | 1             |
| C6       | MCGG1-3-3-7   | -       | +      | -        | -      | -     | -       | 1             |
| C7       | MCWW0-3-4-4   | -       | -      | +        | +      | -     | +       | 3             |
| C8       | MCWW0-3-4-5   | -       | -      | -        | -      | -     | -       |               |
| C9       | MCGG1-3-6-8   | -       | -      | +        | +      | -     | -       | 2             |
| C10      | MCAA0-3-7-6   | -       | -      | -        | -      | -     | -       |               |
| C11      | MCAA0-3-7-7   | -       | -      | -        | -      | -     | -       |               |
| C12      | MCGG2-3-8-7   | -       | +      | -        | -      | -     | -       | 1             |
| C13      | MCGG2-3-8-8   | -       | -      | -        | -      | -     | -       |               |
| C14      | MCTT2-3-9-5   | -       | -      | -        | -      | -     | +       | 1             |
| C15      | MCTT2-3-9-6   | -       | -      | -        | -      | -     | +       | 1             |
| C16      | MCWW0-3-10-9  | -       | +      | -        | -      | -     | -       | 1             |
| C17      | MCWW0-3-10-10 | -       | -      | -        | -      | -     | +       | 1             |
| C18      | MCGG2-3-12-4  | -       | -      | -        | -      | -     | +       | 1             |
| C19      | MCGG1-3-13-5  | -       | -      | +        | -      | -     | -       | 1             |
| C20      | MCGG1-3-14-4  | -       | -      | -        | -      | -     | -       |               |
| C21      | MCGG1-3-15-3  | -       | +      | -        | -      | -     | -       | 1             |
| C22      | MCWW0-3-16-5  | -       | -      | +        | -      | -     | -       | 1             |
| C23      | MCWW0-3-16-6  | -       | -      | -        | -      | -     | -       |               |
| C24      | MCGG1-3-17-4  | +       | -      | -        | -      | -     | -       | 1             |
| C25      | MCAA0-18-2    | -       | -      | -        | -      | -     | -       |               |
| C26      | MCAA0-3-19-5  | -       | -      | -        | -      | -     | +       | 1             |
| C27      | MCAA0-3-19-6  | -       | +      | -        | +      | -     | -       | 2             |
| C28      | MCGG2-3-20-9  | -       | -      | -        | -      | -     | +       | 1             |
| C29      | MCGG2-3-20-10 | -       | -      | -        | -      | +     | -       | 1             |
| C30      | MCAA0-3-21-5  | -       | -      | +        | -      | -     | -       | 1             |
| C31      | MCGG1-3-22-8  | -       | -      | -        | -      | -     | -       |               |
| M1       | MMKK0-3-1-5   | -       | -      | -        | -      | -     | +       | 1             |
| M2       | MMKK0-3-1-6   | -       | +      | -        | -      | -     | -       | 1             |
| M3       | MMKK0-3-2-7   | -       | +      | +        | -      | -     | -       | 2             |
| M4       | MMKK0-3-2-8   | -       | -      | -        | -      | -     | -       |               |
| M5       | MMGG2-3-3-7   | -       | +      | -        | -      | -     | -       | 1             |
| M6       | MMKK0-3-4-8   | -       | -      | -        | -      | -     | -       |               |
| M7       | MMKK0-3-5-6   | -       | -      | -        | -      | -     | -       |               |
| M8       | MMKK0-3-5-7   | -       | +      | +        | -      | -     | -       | 2             |
| M9       | MMGG2-3-6-6   | -       | -      | -        | -      | -     | +       | 1             |
| M10      | MMGG2-3-6-7   | -       | -      | -        | +      | -     | +       | 2             |
| M11      | MMKK0-3-7-6   | -       | -      | -        | +      | -     | +       | 2             |
| M12      | MMKK0-3-7-7   | -       | -      | +        | -      | -     | +       | 2             |
| M13      | MMKK0-3-8-2   | -       | +      | -        | +      | -     | -       | 2             |
| M14      | MMJJ0-3-9-4   | -       | -      | +        | -      | -     | +       | 2             |
| M15      | MMJJ0-3-9-5   | -       | -      | +        | +      | -     | +       | 3             |
| M16      | MMKK0-3-10-7  | -       | -      | +        | +      | -     | +       | 3             |

---

|     |               |   |   |   |   |   |   |   |
|-----|---------------|---|---|---|---|---|---|---|
| M17 | MMKK0-3-10-8  | - | - | + | - | - | + | 2 |
| M18 | MMKK0-3-11-10 | - | + | - | + | - | + | 3 |
| M19 | MMKK0-3-12-5  | - | + | - | + | - | + | 3 |
| M20 | MMKK0-3-13-10 | - | - | - | - | - | - |   |
| M21 | MMKK0-3-13-11 | - | - | - | - | - | - |   |
| M22 | MMKK0-3-13-9  | - | + | - | - | - | - | 1 |
| M23 | MMJJ0-3-14-7  | + | + | + | - | - | - | 3 |
| M24 | MMKK0-3-15-7  | - | - | - | - | - | - |   |
| M25 | MMKK0-3-15-8  | - | - | - | - | - | - |   |
| M26 | MMKK0-3-15-9  | - | - | - | - | - | - |   |
| M27 | MMJJ0-3-16-10 | - | - | - | - | - | + | 1 |
| M28 | MMJJ0-3-16-11 | - | - | - | - | - | - |   |
| M29 | MMJJ0-3-16-12 | - | - | - | + | - | + | 2 |

---
