# Supplementary material for: Pesticide Methoxychlor Promotes the Epigenetic Transgenerational Inheritance of Adult-Onset Disease through the Female Germline
Source: PubMed Central journal article supplement (PMC4109920; doi:10.1371/journal.pone.0102091), 2014-07-24
Supplement: pone.0102091.s007.pdf [file pone.0102091.s007.pdf]

## Supplemental Table S4

**A.** Body Weight in F4 generation Outcross and Reverse Outcross female rats of Control and Methoxychlor lineages (mean  $\pm$  standard error).

| Generation | Lineage                       | Sex | Body Weight (grams) |
|------------|-------------------------------|-----|---------------------|
| F4         | Outcross Control              | F   | 291.7<br>$\pm$ 3.25 |
| F4         | Outcross Methoxychlor         | F   | 297.8<br>$\pm$ 4.86 |
| F4         | Reverse Outcross Control      | F   | 294.9<br>$\pm$ 4.89 |
| F4         | Reverse Outcross Methoxychlor | F   | 294.4<br>$\pm$ 3.15 |

**B.** Body weight (grams) in F4 generation Outcross and Reverse Outcross male rats of Control and Methoxychlor lineages (mean  $\pm$  standard error).

| Generation | Lineage                       | Sex | Body Weight (grams) |
|------------|-------------------------------|-----|---------------------|
| F4         | Outcross Control              | M   | 533.8<br>$\pm$ 7.44 |
| F4         | Outcross Methoxychlor         | M   | 519.5<br>$\pm$ 9.93 |
| F4         | Reverse Outcross Control      | M   | 507.7<br>$\pm$ 5.53 |
| F4         | Reverse Outcross Methoxychlor | M   | 519.9<br>$\pm$ 6.58 |
