# Supplementary material for: Pesticide Methoxychlor Promotes the Epigenetic Transgenerational Inheritance of Adult-Onset Disease through the Female Germline
Source: PubMed Central journal article supplement (PMC4109920; doi:10.1371/journal.pone.0102091), 2014-07-24
Supplement: pone.0102091.s008.pdf [file pone.0102091.s008.pdf]

## Supplemental Table S5

### A. Individual disease incidence in F4 generation Outcross female rats of Control and Methoxychlor lineages.

| Serial Number | Rat ID      | Puberty | Ovary | Uterus | Kidney | Tumor | Obesity | Total Disease |
|---------------|-------------|---------|-------|--------|--------|-------|---------|---------------|
| C1            | MOC5-O4-1-1 | -       | -     | -      | -      | -     | -       |               |
| C2            | MOC5-O4-1-2 | -       | -     | -      | -      | -     | -       |               |
| C3            | MOC5-O4-1-3 | -       | -     | -      | -      | -     | -       |               |
| C4            | MOC5-O4-1-4 | -       | -     | -      | +      | -     | -       | 1             |
| C5            | MOC5-O4-1-5 | +       | -     | -      | +      | -     | -       | 2             |
| C6            | MOC5-O4-1-6 | +       | -     | -      | -      | -     | -       | 1             |
| C7            | MOC5-O4-1-7 | -       | -     | -      | +      | -     | -       | 1             |
| C8            | MOC4-O4-2-1 | -       | -     | -      | -      | -     | -       |               |
| C9            | MOC4-O4-2-2 | -       | -     | -      | -      | -     | +       | 1             |
| C10           | MOC4-O4-2-3 | -       | -     | -      | -      | -     | -       |               |
| C11           | MOC4-O4-2-4 | -       | +     | -      | +      | -     | -       | 2             |
| C12           | MOC4-O4-2-6 | -       | -     | -      | -      | -     | +       | 1             |
| C13           | MOC4-O4-2-7 | -       | -     | -      | -      | -     | +       | 1             |
| C14           | MOC7-O4-3-1 | -       | -     | -      | -      | +     | -       | 1             |
| C15           | MOC7-O4-3-3 | -       | -     | +      | -      | -     | -       | 1             |
| C16           | MOC8-O4-4-1 | -       | -     | -      | -      | -     | -       |               |
| C17           | MOC8-O4-4-2 | -       | -     | -      | -      | -     | -       |               |
| C18           | MOC2-O4-5-1 | -       | +     | -      | -      | -     | -       | 1             |
| C19           | MOC2-O4-5-2 | -       | -     | -      | -      | -     | +       | 1             |
| C20           | MOC2-O4-5-3 | -       | -     | -      | -      | -     | +       | 1             |
| C21           | MOC2-O4-5-6 | -       | -     | -      | -      | -     | +       | 1             |
| C22           | MOC1-O4-6-1 | -       | -     | +      | -      | -     | -       | 1             |
| C23           | MOC1-O4-6-2 | -       | -     | +      | -      | -     | -       | 1             |
| C24           | MOC6-O4-7-1 | -       | -     | -      | -      | -     | +       | 1             |
| C25           | MOC6-O4-7-3 | -       | -     | -      | -      | -     | +       | 1             |
| M1            | MOM7-O4-1-2 | -       | -     | +      | +      | +     | -       | 3             |
| M2            | MOM7-O4-1-3 | -       | -     | -      | +      | -     | -       | 1             |
| M3            | MOM5-O4-2-1 | -       | -     | -      | -      | -     | +       | 1             |
| M4            | MOM5-O4-2-3 | -       | -     | -      | -      | -     | +       | 1             |
| M5            | MOM3-O4-3-2 | -       | -     | +      | -      | -     | -       | 1             |
| M6            | MOM3-O4-3-3 | -       | +     | -      | -      | -     | -       | 1             |
| M7            | MOM3-O4-3-4 | -       | +     | -      | -      | -     | -       | 1             |
| M8            | MOM3-O4-3-5 | -       | -     | -      | -      | -     | +       | 1             |
| M9            | MOM8-O4-5-1 | -       | -     | -      | -      | -     | -       |               |
| M10           | MOM8-O4-5-2 | -       | -     | -      | -      | -     | +       | 1             |
| M11           | MOM8-O4-5-3 | -       | +     | -      | -      | -     | +       | 2             |
| M12           | MOM8-O4-5-4 | -       | -     | -      | +      | -     | -       | 1             |
| M13           | MOM6-O4-7-1 | -       | -     | -      | -      | -     | -       |               |
| M14           | MOM6-O4-7-2 | -       | +     | -      | -      | -     | -       | 1             |
| M15           | MOM6-O4-7-4 | -       | -     | -      | -      | -     | -       |               |
| M16           | MOM6-O4-7-5 | -       | -     | -      | +      | -     | +       | 2             |
| M17           | MOM6-O4-7-6 | -       | -     | -      | +      | -     | +       | 2             |
| M18           | MOM6-O4-7-7 | -       | -     | -      | +      | -     | +       | 2             |
| M19           | MOM2-O4-8-1 | -       | -     | -      | -      | -     | +       | 1             |

**B. Individual disease incidence in F4 generation Outcross male rats of Control and Methoxychlor lineages.**

| Serial Number | Rat ID       | Puberty | Testis | Kidney | Tumor | Obesity | Total Disease |
|---------------|--------------|---------|--------|--------|-------|---------|---------------|
| C1            | MOC5-O4-1-9  | -       | -      | -      | -     | -       |               |
| C2            | MOC5-O4-1-10 | -       | +      | +      | -     | -       | 2             |
| C3            | MOC5-O4-1-11 | -       | -      | -      | -     | +       | 1             |
| C4            | MOC5-O4-1-12 | -       | -      | +      | -     | -       | 1             |
| C5            | MOC4-O4-2-9  | -       | -      | -      | -     | -       |               |
| C6            | MOC4-O4-2-10 | -       | -      | -      | -     | -       |               |
| C7            | MOC4-O4-2-11 | -       | -      | -      | -     | -       |               |
| C8            | MOC4-O4-2-12 | -       | -      | -      | -     | -       |               |
| C9            | MOC4-O4-2-13 | -       | +      | -      | -     | -       | 1             |
| C10           | MOC7-O4-3-6  | -       | -      | +      | -     | +       | 2             |
| C11           | MOC7-O4-3-7  | -       | -      | +      | -     | -       | 1             |
| C12           | MOC7-O4-3-8  | -       | -      | -      | -     | +       | 1             |
| C13           | MOC7-O4-3-9  | -       | -      | +      | -     | -       | 1             |
| C14           | MOC7-O4-3-11 | -       | -      | -      | -     | +       | 1             |
| C15           | MOC8-O4-4-5  | -       | -      | -      | -     | +       | 1             |
| C16           | MOC8-O4-4-6  | -       | -      | -      | -     | +       | 1             |
| C17           | MOC2-O4-5-10 | -       | -      | +      | -     | -       | 1             |
| C18           | MOC2-O4-5-11 | -       | -      | +      | -     | -       | 1             |
| C19           | MOC1-O4-6-5  | -       | -      | +      | -     | +       | 2             |
| C20           | MOC1-O4-6-6  | -       | -      | +      | -     | -       | 1             |
| C21           | MOC1-O4-6-7  | -       | -      | +      | -     | -       | 1             |
| C22           | MOC1-O4-6-8  | -       | -      | -      | -     | +       | 1             |
| C23           | MOC1-O4-6-9  | -       | -      | -      | -     | +       | 1             |
| C24           | MOC1-O4-6-10 | -       | -      | -      | -     | +       | 1             |
| C25           | MOC6-O4-7-6  | -       | -      | +      | -     | -       | 1             |
| C26           | MOC6-O4-7-7  | -       | -      | -      | -     | +       | 1             |
| C27           | MOC6-O4-7-8  | -       | -      | -      | -     | +       | 1             |
| C28           | MOC6-O4-7-9  | -       | -      | +      | -     | -       | 1             |
| C29           | MOC6-O4-7-10 | -       | -      | -      | -     | -       |               |
| M1            | MOM7-O4-1-8  | -       | +      | -      | -     | -       | 1             |
| M2            | MOM7-O4-1-9  | -       | -      | -      | -     | -       |               |
| M3            | MOM5-O4-2-7  | -       | +      | -      | -     | -       | 1             |
| M4            | MOM5-O4-2-8  | -       | +      | +      | -     | -       | 2             |
| M5            | MOM5-O4-2-9  | -       | -      | -      | -     | -       |               |
| M6            | MOM3-O4-3-10 | -       | -      | -      | -     | -       |               |
| M7            | MOM3-O4-3-11 | -       | -      | +      | -     | -       | 1             |
| M8            | MOM3-O4-3-12 | -       | -      | -      | -     | +       | 1             |
| M9            | MOM1-O4-4-9  | -       | -      | -      | -     | +       | 1             |
| M10           | MOM1-O4-4-10 | -       | -      | -      | -     | +       | 1             |
| M11           | MOM1-O4-4-11 | -       | -      | -      | -     | +       | 1             |
| M12           | MOM8-O4-5-8  | -       | -      | +      | -     | -       | 1             |
| M13           | MOM8-O4-5-9  | -       | -      | +      | -     | -       | 1             |
| M14           | MOM8-O4-5-10 | -       | -      | -      | -     | -       |               |
| M15           | MOM8-O4-5-11 | -       | -      | -      | -     | +       | 1             |
| M16           | MOM8-O4-5-12 | -       | -      | +      | -     | +       | 2             |
| M17           | MOM4-O4-6-9  | -       | -      | +      | -     | -       | 1             |
| M18           | MOM4-O4-6-10 | -       | -      | -      | -     | +       | 1             |
| M19           | MOM4-O4-6-11 | -       | -      | +      | -     | +       | 2             |
| M20           | MOM6-O4-7-12 | +       | -      | +      | -     | -       | 2             |
| M21           | MOM2-O4-8-2  | -       | -      | -      | -     | +       | 1             |
| M22           | MOM2-O4-8-3  | -       | -      | -      | -     | +       | 1             |
