# Supplementary material for: Pesticide Methoxychlor Promotes the Epigenetic Transgenerational Inheritance of Adult-Onset Disease through the Female Germline
Source: PubMed Central journal article supplement (PMC4109920; doi:10.1371/journal.pone.0102091), 2014-07-24
Supplement: pone.0102091.s009.pdf [file pone.0102091.s009.pdf]

## Supplemental Table S6

A. Individual disease incidence in F4 generation Reverse Outcross female rats of Control and Methoxychlor lineages.

| Serial Number | Rat ID        | Puberty | Ovary | Uterus | Kidney | Tumor | Obesity | Total Disease |
|---------------|---------------|---------|-------|--------|--------|-------|---------|---------------|
| C1            | MCCGG1-R4-1-1 | -       | -     | -      | -      | -     | -       |               |
| C2            | MCCGG1-R4-1-2 | -       | -     | -      | -      | -     | -       |               |
| C3            | MCCGG1-R4-1-3 | -       | -     | +      | -      | -     | -       | 1             |
| C4            | MCTT2-R4-2-1  | -       | -     | +      | -      | -     | +       | 2             |
| C5            | MCTT2-R4-2-2  | -       | -     | +      | -      | -     | +       | 2             |
| C6            | MCTT2-R4-2-4  | -       | -     | +      | -      | -     | -       | 1             |
| C7            | MCTT2-R4-2-5  | -       | -     | +      | -      | -     | -       | 1             |
| C8            | MCWW0-R4-3-1  | -       | +     | -      | -      | -     | +       | 2             |
| C9            | MCWW0-R4-3-2  | -       | -     | +      | -      | -     | +       | 2             |
| C10           | MCGG1-R4-4-1  | +       | -     | -      | -      | -     | -       | 1             |
| C11           | MCGG1-R4-4-2  | +       | -     | -      | -      | -     | -       | 1             |
| C12           | MCGG1-R4-4-3  | -       | -     | +      | -      | -     | -       | 1             |
| C13           | MCAA0-R4-5-1  | -       | -     | -      | -      | -     | -       |               |
| C14           | MCAA0-R4-5-2  | -       | -     | -      | -      | -     | -       |               |
| C15           | MCGG1-R4-6-1  | -       | -     | +      | +      | -     | -       | 2             |
| C16           | MCGG1-R4-6-2  | -       | -     | -      | -      | -     | -       |               |
| C17           | MCGG1-R4-6-3  | -       | -     | -      | -      | -     | -       |               |
| C18           | MCGG2-R4-7-1  | -       | -     | -      | +      | -     | -       | 1             |
| C19           | MCGG2-R4-7-2  | -       | -     | -      | +      | -     | -       | 1             |
| M1            | MMGG2-R4-1-1  | -       | -     | +      | +      | -     | -       | 2             |
| M2            | MMGG2-R4-1-2  | -       | +     | -      | -      | -     | -       | 1             |
| M3            | MMKK0-R4-2-1  | +       | -     | +      | +      | -     | -       | 3             |
| M4            | MMKK0-R4-3-2  | -       | -     | +      | +      | -     | -       | 2             |
| M5            | MMKK0-R4-3-3  | -       | +     | -      | -      | -     | -       | 1             |
| M6            | MMKK0-R4-4-1  | -       | -     | -      | -      | +     | -       | 1             |
| M7            | MMKK0-R4-4-4  | -       | -     | +      | -      | -     | -       | 1             |
| M8            | MMKK0-R4-7-3  | -       | -     | -      | +      | -     | -       | 1             |
| M9            | MMKK0-R4-7-4  | -       | -     | +      | +      | -     | -       | 2             |
| M10           | MMKK0-R4-7-5  | -       | -     | +      | +      | -     | -       | 2             |
| M11           | MMKK0-R4-7-6  | -       | -     | +      | +      | -     | -       | 2             |
| M12           | MMKK0-R4-7-7  | -       | -     | -      | +      | -     | -       | 1             |
| M13           | MMKK0-R4-8-1  | -       | -     | -      | -      | -     | +       | 1             |
| M14           | MMKK0-R4-8-2  | -       | -     | -      | +      | -     | +       | 2             |
| M15           | MMKK0-R4-8-3  | -       | -     | -      | +      | -     | +       | 2             |
| M16           | MMKK0-R4-8-4  | -       | -     | -      | +      | -     | +       | 2             |
| M17           | MMKK0-R4-8-5  | -       | -     | -      | -      | -     | +       | 1             |

**B. Individual disease incidence in F4 generation Reverse Outcross male rats of Control and Methoxychlor lineages.**

| Serial Number | Rat ID        | Puberty | Testis | Kidney | Tumor | Obesity | Total Disease |
|---------------|---------------|---------|--------|--------|-------|---------|---------------|
| C1            | MCTT2-R4-2-9  | -       |        | +      | -     | -       | 1             |
| C2            | MCWW0-R4-3-4  | -       | -      | -      | -     | -       |               |
| C3            | MCWW0-R4-3-5  | -       | -      | -      | -     | -       |               |
| C4            | MCWW0-R4-3-6  | -       | -      | +      | -     | -       | 1             |
| C5            | MCWW0-R4-3-7  | -       | -      | -      | -     | -       |               |
| C6            | MCWW0-R4-3-8  | -       | +      | -      | -     | -       | 1             |
| C7            | MCWW0-R4-3-9  | -       | -      | -      | -     | -       |               |
| C8            | MCGG1-R4-4-6  | -       | -      | -      | -     | -       |               |
| C9            | MCGG1-R4-4-7  | -       | -      |        | -     | -       |               |
| C10           | MCGG1-R4-4-8  | -       | -      | -      | -     | -       |               |
| C11           | MCGG1-R4-4-10 | -       | -      | -      | -     | -       |               |
| C12           | MCGG1-R4-4-11 | -       | -      | -      | -     | -       |               |
| C13           | MCGG1-R4-4-12 | -       | -      | +      | -     | -       | 1             |
| C14           | MCGG1-R4-6-8  | -       |        | +      | -     | -       | 1             |
| C15           | MCGG1-R4-6-9  | -       |        |        | -     | +       | 1             |
| C16           | MCGG2-R4-7-4  | -       |        | +      | -     | -       | 1             |
| C17           | MCGG2-R4-7-6  | -       | -      | +      | -     | -       | 1             |
| C18           | MCGG2-R4-7-7  | -       | -      | +      | -     | -       | 1             |
| C19           | MCGG2-R4-7-8  | -       | -      | +      | -     | -       | 1             |
| M1            | MMGG2-R4-1-6  | -       | -      | +      | -     | -       | 1             |
| M2            | MMGG2-R4-1-7  | -       | -      | +      | -     | -       | 1             |
| M3            | MMGG2-R4-1-8  | -       | -      | +      | -     | -       | 1             |
| M4            | MMGG2-R4-1-9  | -       | -      | +      | -     | -       | 1             |
| M5            | MMKK0-R4-3-8  | -       | -      | +      | -     | -       | 1             |
| M6            | MMKK0-R4-3-9  | -       | +      | +      | -     | -       | 2             |
| M7            | MMKK0-R4-4-9  | +       | -      | +      | -     | +       | 3             |
| M8            | MMKK0-R4-4-10 | -       | +      | +      | -     | +       | 3             |
| M9            | MMKK0-R4-4-11 | -       | -      | +      | -     | +       | 2             |
| M10           | MMGG2-R4-5-6  | -       |        |        | -     | +       | 1             |
| M11           | MMGG2-R4-5-8  | -       |        |        | -     | +       | 1             |
| M12           | MMKK0-R4-6-7  | -       |        |        | -     | +       | 1             |
| M13           | MMKK0-R4-7-9  | -       | -      | +      | -     | -       | 1             |
| M14           | MMKK0-R4-7-10 | -       | -      | +      | -     | -       | 1             |
| M15           | MMKK0-R4-8-7  | -       | -      | +      | -     | +       | 2             |
| M16           | MMKK0-R4-8-8  | -       | -      | +      | -     | +       | 2             |
| M17           | MMKK0-R4-8-9  | -       | +      | +      | -     | -       | 2             |
| M18           | MMKK0-R4-8-10 | -       | +      | +      | -     | +       | 3             |
| M19           | MMKK0-R4-8-13 | -       |        |        | -     | +       | 1             |
