# Supplementary material for: Pesticide Methoxychlor Promotes the Epigenetic Transgenerational Inheritance of Adult-Onset Disease through the Female Germline
Source: PubMed Central journal article supplement (PMC4109920; doi:10.1371/journal.pone.0102091), 2014-07-24
Supplement: pone.0102091.s010.pdf [file pone.0102091.s010.pdf]

## Supplemental Table S7

### Methoxychlor Lineage F3 Generation Sperm Average Epimutations

| Chromosome | cSTART    | cSTOP     | TSS       | NCBI gene ID | Gene Name  |
|------------|-----------|-----------|-----------|--------------|------------|
| chr1       | 108954210 | 108954810 | 108955130 | 29707        | Gabra5     |
| chr1       | 131541261 | 131541861 | 131540948 | 293023       | Kihl25     |
| chr1       | 143415679 | 143416279 | 143415815 | 85431        | Nox4       |
| chr1       | 157945198 | 157945883 | 157945870 | 308857       | Dnajb13    |
| chr1       | 185645938 | 185646538 | 185647581 | 361649       | Atxn2l     |
| chr1       | 203243680 | 203244280 | 203244480 | 24209        | Ascl2      |
| chr1       | 205168543 | 205169143 | 205166049 | 309135       | Ano1       |
| chr1       | 206566558 | 206567158 | 206569503 | 293653       | Acy3       |
| chr1       | 207994578 | 207995178 | 207993021 | 171096       | Cst6       |
| chr1       | 208694707 | 208695307 | 208694860 | 309176       | Mrpl49     |
| chr1       | 209888122 | 209888817 | 209888462 | 171335       | Cox8a      |
| chr1       | 211625999 | 211626599 | 211629024 | 499314       | Tut1       |
| chr1       | 21997763  | 21998363  | 21998005  | 294123       | Taar5      |
| chr1       | 222227402 | 222228002 | 222229865 | 259275       | Ostf1      |
| chr1       | 222271150 | 222271750 | 222274597 | 293871       | RGD1311863 |
| chr1       | 232762359 | 232763038 | 232766488 | 309301       | Rcl1       |
| chr1       | 233363254 | 233363854 | 233361107 | 373544       | Ermp1      |
| chr1       | 246252356 | 246252956 | 246252295 | 361757       | Opalin     |
| chr1       | 248820010 | 248820610 | 248816413 | 309374       | Ankrd2     |
| chr1       | 251275707 | 251276307 | 251278221 | 294007       | Pprc1      |
| chr1       | 253225429 | 253226029 | 253228546 | 114846       | Gsto1      |
| chr1       | 41391892  | 41392492  | 41392522  | 308097       | Tagap      |
| chr1       | 65108322  | 65108922  | 65107536  | 308318       | RGD1308782 |
| chr1       | 72887651  | 72888741  | 72885666  | 361509       | Ube2m      |
| chr1       | 78511795  | 78512395  | 78508576  | 292687       | Qpctl      |
| chr1       | 79833293  | 79833893  | 79832891  | 308429       | RGD1565787 |
| chr1       | 79917004  | 79917604  | 79917951  | 60378        | Lypd3      |
| chr1       | 81266911  | 81267511  | 81266827  | 24300        | Cyp2b1     |
| chr1       | 81778915  | 81779515  | 81780087  | 29295        | Cyp2b12    |
| chr1       | 87132142  | 87132742  | 87130690  | 499129       | Kctd15     |
| chr1       | 94939682  | 94940282  | 94942787  | 292875       | Aspdh      |
| chr2       | 113203764 | 113204364 | 113204303 | 246775       | Tnfsf10    |
| chr2       | 122384576 | 122385176 | 122384815 | 310324       | Dcun1d1    |
| chr2       | 150825988 | 150826588 | 150826482 | 170923       | Rap2b      |
| chr2       | 153733257 | 153733857 | 153733281 | 499630       | RGD1565059 |
| chr2       | 181442601 | 181443201 | 181439450 | 502017       | Dpm3       |
| chr2       | 182790373 | 182790973 | 182787370 | 295214       | S100a1     |
| chr2       | 190419465 | 190420065 | 190422646 | 50654        | Ctss       |
| chr2       | 190652731 | 190653415 | 190653151 | 689432       | Mrps21     |
| chr2       | 198804991 | 198805591 | 198807339 | 60565        | Syt6       |
| chr2       | 199014676 | 199015276 | 199014710 | 365895       | Hipk1      |
| chr2       | 203455748 | 203456348 | 203456121 | 64352        | Gstm5      |
| chr2       | 21046299  | 21046992  | 21046303  | 124323       | Rps23      |
| chr2       | 212465252 | 212465852 | 212464764 | 64443        | Gpr88      |
| chr2       | 226734741 | 226735732 | 226732069 | 64017        | Enpep      |
| chr2       | 235906884 | 235907582 | 235907339 | 310903       | Adh6       |

|      |           |           |           |        |            |
|------|-----------|-----------|-----------|--------|------------|
| chr2 | 239769483 | 239770083 | 239767802 | 310914 | Bmpr1b     |
| chr2 | 258014283 | 258014883 | 258014436 | 362065 | Gpr177     |
| chr2 | 44703563  | 44704163  | 44703931  | 294747 | RGD1561161 |
| chr2 | 45078508  | 45079108  | 45079329  | 78951  | Hspb3      |
| chr2 | 53900491  | 53901091  | 53901011  | 310362 | RGD1305938 |
| chr2 | 88311847  | 88312524  | 88309336  | 499566 | Car13      |
| chr2 | 93381111  | 93381815  | 93382152  | 361916 | Chmp4c     |
| chr2 | 9803782   | 9804382   | 9804234   | 365627 | Mblac2     |
| chr3 | 10579727  | 10580327  | 10580780  | 25698  | Ass1       |
| chr3 | 109741246 | 109741846 | 109743344 | 691966 | Sqrdl      |
| chr3 | 114181958 | 114182558 | 114182384 | 364738 | Gabpb1l    |
| chr3 | 118884297 | 118884897 | 118881211 | 311429 | RGD1311267 |
| chr3 | 143178668 | 143179268 | 143178674 | 24888  | Bcl2l1     |
| chr3 | 153171837 | 153172437 | 153172076 | 362263 | Ptprt      |
| chr3 | 154746395 | 154746995 | 154748976 | 29576  | Wisps2     |
| chr3 | 156275667 | 156276267 | 156275540 | 29182  | Cdh22      |
| chr3 | 157964936 | 157965536 | 157967941 | 296380 | Arfgef2    |
| chr3 | 159773002 | 159773602 | 159773643 | 311658 | Nfatc2     |
| chr3 | 169311014 | 169311614 | 169311204 | 81775  | Rps21      |
| chr3 | 169566659 | 169567359 | 169567487 | 366274 | Ntsr1      |
| chr3 | 170066055 | 170066655 | 170064582 | 296469 | Nkain4     |
| chr3 | 40429016  | 40429616  | 40430149  | 366057 | Gapdh-ps1  |
| chr3 | 4558121   | 4558721   | 4557651   | 306322 | Sdccag3    |
| chr3 | 55817065  | 55817665  | 55818634  | 362149 | Cir1       |
| chr3 | 69364020  | 69364719  | 69364756  | 404888 | Olr483     |
| chr3 | 72453353  | 72453953  | 72454364  | 404841 | Olr636     |
| chr3 | 73453260  | 73453860  | 73451888  | 404824 | Olr681     |
| chr3 | 73938062  | 73938662  | 73939193  | 366112 | Olr705     |
| chr3 | 7456924   | 7457524   | 7456260   | 362094 | Mrps2      |
| chr3 | 75209387  | 75209987  | 75210001  | 295922 | Mtch2      |
| chr3 | 76854377  | 76855072  | 76854414  | 311204 | Slc35c1    |
| chr3 | 8059300   | 8059900   | 8059535   | 499765 | RGD1564114 |
| chr3 | 89819495  | 89820095  | 89816787  | 83617  | Hipk3      |
| chr4 | 104812523 | 104813201 | 104812176 | 282834 | Vps24      |
| chr4 | 134542013 | 134542613 | 134541533 | 65275  | Gpr27      |
| chr4 | 149256959 | 149257559 | 149259252 | 362414 | Tada3l     |
| chr4 | 152757456 | 152758056 | 152757539 | 405214 | Olr825     |
| chr4 | 158955841 | 158956441 | 158959285 | 362429 | Mfap5      |
| chr4 | 160708747 | 160709347 | 160712581 | 312705 | C1r        |
| chr4 | 164676391 | 164676991 | 164674386 | 408222 | Senp18     |
| chr4 | 165760727 | 165761450 | 165760257 | 500331 | LOC500331  |
| chr4 | 177160113 | 177160713 | 177162109 | 497197 | Plcz1      |
| chr4 | 184636443 | 184637043 | 184636279 | 500366 | Rep15      |
| chr4 | 54901508  | 54902108  | 54902331  | 60590  | Grm8       |
| chr4 | 57448670  | 57449270  | 57452110  | 296959 | Cpa2       |
| chr4 | 65997649  | 65998249  | 65999405  | 312248 | Ubn2       |
| chr4 | 76617978  | 76618578  | 76621827  | 436582 | Atp6v0e2   |
| chr5 | 122063213 | 122063813 | 122062871 | 29223  | Ak3l1      |
| chr5 | 135901429 | 135902029 | 135901623 | 170544 | Cyp4a1     |
| chr5 | 136836197 | 136836797 | 136834619 | 619582 | Tmem69     |
| chr5 | 148718180 | 148718780 | 148718296 | 313050 | Lck        |

---

|      |           |           |           |        |            |
|------|-----------|-----------|-----------|--------|------------|
| chr5 | 153707676 | 153708276 | 153707653 | 170933 | Syf2       |
| chr5 | 160621088 | 160621688 | 160621531 | 313668 | Ddi2       |
| chr5 | 160643337 | 160644052 | 160646313 | 298607 | Agmat      |
| chr5 | 160700556 | 160701156 | 160700757 | 362652 | Dnajc16    |
| chr5 | 163764037 | 163764637 | 163762227 | 25069  | Tnfrsf8    |
| chr5 | 169412678 | 169413278 | 169409305 | 26759  | Acot7      |
| chr5 | 17120943  | 17121543  | 17120959  | 122772 | Rps20      |
| chr5 | 64096338  | 64096938  | 64096576  | 313231 | Alg2       |
| chr5 | 66330524  | 66331204  | 66329047  | 362518 | RGD1307218 |
| chr5 | 66371922  | 66372620  | 66371469  | 313216 | Rnf20      |
| chr6 | 101723802 | 101724402 | 101722655 | 362756 | Pigh       |
| chr6 | 104749340 | 104749940 | 104749464 | 24777  | Slc10a1    |
| chr6 | 108075603 | 108076203 | 108075507 | 681337 | Acot4      |
| chr6 | 108089268 | 108089868 | 108089348 | 314304 | Acot3      |
| chr6 | 115024215 | 115024815 | 115024998 | 25360  | Tshr       |
| chr6 | 126696183 | 126696982 | 126694869 | 63865  | Lgmn       |
| chr6 | 24061917  | 24062517  | 24060920  | 192209 | Spdya      |
| chr6 | 44114675  | 44115275  | 44113910  | 65190  | Rsad2      |
| chr6 | 48264069  | 48264669  | 48263991  | 298936 | Sntg2      |
| chr6 | 54239524  | 54240124  | 54240268  | 25690  | Ahr        |
| chr6 | 75647016  | 75647616  | 75649846  | 29673  | Psma6      |
| chr6 | 95477587  | 95478187  | 95475389  | 114634 | Six1       |
| chr6 | 99555294  | 99555894  | 99553851  | 60661  | Max        |
| chr7 | 10061255  | 10061951  | 10060456  | 117107 | Zbtb7a     |
| chr7 | 10130545  | 10131145  | 10129162  | 64517  | Thop1      |
| chr7 | 10318546  | 10319146  | 10319958  | 252928 | Timm13     |
| chr7 | 10920788  | 10921388  | 10920010  | 299611 | Apc2       |
| chr7 | 10922579  | 10923179  | 10920010  | 299611 | Apc2       |
| chr7 | 10922779  | 10923469  | 10920010  | 299611 | Apc2       |
| chr7 | 113020690 | 113021290 | 113018824 | 353498 | Cyp11b3    |
| chr7 | 117239842 | 117240528 | 117237887 | 65200  | Slc16a8    |
| chr7 | 117566855 | 117567455 | 117566504 | 315131 | Kdelr3     |
| chr7 | 117931790 | 117932390 | 117930155 | 315134 | Josd1      |
| chr7 | 118167516 | 118168116 | 118165701 | 362962 | Cbx7       |
| chr7 | 120225977 | 120226577 | 120223146 | 192246 | Phf5a      |
| chr7 | 120752247 | 120752847 | 120752274 | 171522 | Cyp2d4     |
| chr7 | 120783413 | 120784013 | 120783140 | 24303  | Cyp2d3     |
| chr7 | 122319329 | 122319929 | 122322459 | 689069 | Parvg      |
| chr7 | 137224969 | 137225569 | 137223614 | 24528  | Lalba      |
| chr7 | 137413059 | 137413659 | 137412091 | 300208 | Ddx23      |
| chr7 | 137558322 | 137559108 | 137557835 | 24881  | Wnt1       |
| chr7 | 140811305 | 140811905 | 140814662 | 300253 | Eif4b      |
| chr7 | 141014388 | 141014988 | 141014108 | 685072 | Rarg       |
| chr7 | 21461475  | 21462075  | 21461412  | 299694 | Nuak1      |
| chr7 | 56932210  | 56932810  | 56931919  | 314855 | Cpm        |
| chr8 | 100655577 | 100656177 | 100655662 | 501038 | LOC501038  |
| chr8 | 111573057 | 111573657 | 111573458 | 29283  | Rpl29      |
| chr8 | 111573357 | 111573957 | 111573458 | 29283  | Rpl29      |
| chr8 | 11394350  | 11394950  | 11392970  | 315430 | Amotl1     |
| chr8 | 118350791 | 118351391 | 118350134 | 501083 | Pdcd6ip    |
| chr8 | 120682896 | 120683496 | 120680453 | 81810  | Tgfb2      |

---

---

|       |           |           |           |        |            |
|-------|-----------|-----------|-----------|--------|------------|
| chr8  | 124305165 | 124305765 | 124303798 | 301059 | Myd88      |
| chr8  | 124305670 | 124306270 | 124303798 | 301059 | Myd88      |
| chr8  | 21027333  | 21027933  | 21029968  | 300441 | Tmem205    |
| chr8  | 40572492  | 40573092  | 40573738  | 498140 | RGD1560888 |
| chr8  | 52095202  | 52095802  | 52094813  | 353227 | Zbtb16     |
| chr8  | 60673757  | 60674357  | 60673400  | 315696 | Snx33      |
| chr8  | 62361207  | 62361807  | 62361346  | 315716 | Cd276      |
| chr8  | 68371054  | 68371654  | 68366801  | 64302  | Rpl4       |
| chr9  | 10394574  | 10395174  | 10396315  | 316237 | Mad211bp   |
| chr9  | 108299861 | 108300461 | 108303606 | 116724 | Epb4.1l3   |
| chr9  | 11053753  | 11054438  | 11050948  | 316241 | Nfkbie     |
| chr9  | 35306502  | 35307102  | 35303816  | 316328 | RGD1309220 |
| chr9  | 35480193  | 35480793  | 35479314  | 316330 | Ankrd23    |
| chr9  | 39492146  | 39492746  | 39492186  | 171106 | Il1rl2     |
| chr9  | 42237153  | 42237753  | 42236808  | 301372 | Gpr45      |
| chr9  | 79165909  | 79166509  | 79166330  | 29366  | Serpine2   |
| chr9  | 8281071   | 8281671   | 8282627   | 301230 | RGD1565959 |
| chr9  | 84373776  | 84374376  | 84374287  | 363269 | Sp100      |
| chr9  | 87051969  | 87052569  | 87052168  | 574523 | Ugt1a5     |
| chr9  | 91718586  | 91719186  | 91718819  | 405023 | Olr1345    |
| chr9  | 91796198  | 91796798  | 91797534  | 405022 | Olr1350    |
| chr9  | 92652623  | 92653223  | 92655566  | 367318 | Ano7       |
| chr9  | 93074370  | 93074970  | 93074168  | 301622 | Dtymk      |
| chr9  | 93187556  | 93188156  | 93185687  | 301626 | Pdcd1      |
| chr10 | 106039395 | 106039995 | 106039287 | 287834 | Recql5     |
| chr10 | 106318772 | 106319372 | 106318381 | 360664 | RGD1311078 |
| chr10 | 106948558 | 106949158 | 106948652 | 360665 | Jmjd6      |
| chr10 | 109317332 | 109317932 | 109317686 | 287873 | Chmp6      |
| chr10 | 109964795 | 109965395 | 109961716 | 25506  | P4hb       |
| chr10 | 12056590  | 12057190  | 12059820  | 58923  | Mefv       |
| chr10 | 13286541  | 13287141  | 13288980  | 287108 | Prss27     |
| chr10 | 13679781  | 13680381  | 13682999  | 29740  | Dci        |
| chr10 | 13991771  | 13992371  | 13992928  | 685059 | Sepx1      |
| chr10 | 14134128  | 14134728  | 14134994  | 287125 | Nubp2      |
| chr10 | 14211586  | 14212186  | 14211106  | 360492 | Hn1l       |
| chr10 | 15492241  | 15492841  | 15492467  | 360502 | Itfg3      |
| chr10 | 27314185  | 27314785  | 27313725  | 29705  | Gabra1     |
| chr10 | 34738266  | 34738866  | 34740401  | 287241 | Olr1387    |
| chr10 | 34748223  | 34748823  | 34751126  | 405066 | Olr1388    |
| chr10 | 36167362  | 36167962  | 36168654  | 287899 | Adamts2    |
| chr10 | 36415685  | 36416375  | 36412495  | 497896 | RGD1563273 |
| chr10 | 36805864  | 36806464  | 36808660  | 353303 | Col23a1    |
| chr10 | 37281198  | 37281798  | 37283895  | 287275 | Sec24a     |
| chr10 | 45237163  | 45237763  | 45238122  | 303175 | Hist3h2ba  |
| chr10 | 46845038  | 46845638  | 46845809  | 54265  | Llgl1      |
| chr10 | 4808722   | 4809422   | 4808353   | 24685  | Prm1       |
| chr10 | 56724861  | 56725461  | 56721932  | 691982 | Tmem95     |
| chr10 | 57193900  | 57194500  | 57194388  | 81639  | Alox15     |
| chr10 | 61512936  | 61513536  | 61516479  | 405994 | Olr1515    |
| chr10 | 63363670  | 63364270  | 63363231  | 497957 | RGD1565611 |
| chr10 | 64611178  | 64611778  | 64607332  | 287545 | Sarm1      |

---

---

|       |           |           |           |        |            |
|-------|-----------|-----------|-----------|--------|------------|
| chr10 | 67405283  | 67405883  | 67407202  | 94189  | Gosr1      |
| chr10 | 7024085   | 7024685   | 7022517   | 302915 | Pmm2       |
| chr10 | 84451966  | 84452566  | 84452883  | 497984 | Znf652     |
| chr10 | 89383167  | 89383767  | 89385133  | 360629 | Nt5c3l     |
| chr10 | 89562598  | 89563198  | 89563723  | 303536 | Dnajc7     |
| chr10 | 90471685  | 90472285  | 90470075  | 64306  | Rpl27      |
| chr10 | 90493272  | 90493872  | 90491463  | 287721 | Vat1       |
| chr10 | 91363525  | 91364125  | 91364902  | 303567 | Tmub2      |
| chr10 | 92289606  | 92290206  | 92290288  | 498008 | Hexim1     |
| chr10 | 97217513  | 97218113  | 97214444  | 140725 | Cacng4     |
| chr11 | 20422699  | 20423299  | 20423191  | 288280 | Ncam2      |
| chr11 | 33787230  | 33787830  | 33785529  | 245975 | Setd4      |
| chr11 | 43605295  | 43606009  | 43604993  | 304021 | Col8a1     |
| chr11 | 80620258  | 80620858  | 80623183  | 25666  | Dgkg       |
| chr11 | 82425875  | 82426475  | 82426105  | 498109 | Polr2h     |
| chr11 | 84559192  | 84559792  | 84561590  | 24267  | Comt       |
| chr12 | 11198985  | 11199585  | 11198145  | 116693 | Cyth3      |
| chr12 | 12417445  | 12418141  | 12420876  | 304299 | Radil      |
| chr12 | 15825163  | 15825763  | 15825016  | 171097 | Adap1      |
| chr12 | 19692924  | 19693524  | 19690356  | 304374 | Fbxo24     |
| chr12 | 19752379  | 19752979  | 19752171  | 304375 | Agfg2      |
| chr12 | 22722183  | 22722783  | 22724526  | 368190 | Dnajc30    |
| chr12 | 22726579  | 22727179  | 22724526  | 368190 | Dnajc30    |
| chr12 | 2531703   | 2532303   | 2529952   | 304195 | Pcp2       |
| chr12 | 27741478  | 27742154  | 27744408  | 24434  | Gusb       |
| chr12 | 27812784  | 27813384  | 27813093  | 399684 | Vkorc1l1   |
| chr12 | 33288679  | 33289279  | 33289889  | 304470 | Sbno1      |
| chr12 | 33847475  | 33848166  | 33847985  | 689936 | Gpr81      |
| chr12 | 36805324  | 36805924  | 36806060  | 192281 | Oas1a      |
| chr12 | 37336496  | 37337176  | 37332257  | 124451 | Lhx5       |
| chr12 | 42555971  | 42556661  | 42552590  | 288701 | Sfrs9      |
| chr12 | 42579033  | 42579633  | 42580541  | 58945  | Dynll1     |
| chr12 | 42953814  | 42954414  | 42951259  | 288704 | RGD1311899 |
| chr12 | 46024247  | 46024847  | 46024977  | 304567 | Pus1       |
| chr13 | 33464155  | 33464755  | 33465845  | 304743 | Ccdc93     |
| chr13 | 44891786  | 44892466  | 44891368  | 304786 | Elk4       |
| chr13 | 45390825  | 45391496  | 45392326  | 498229 | Tmem81     |
| chr13 | 47092307  | 47092998  | 47095239  | 289032 | Chit1      |
| chr13 | 72785774  | 72786374  | 72787821  | 89868  | Sec16b     |
| chr13 | 76594928  | 76595528  | 76594418  | 304918 | Zbtb37     |
| chr13 | 86914892  | 86915576  | 86911743  | 116591 | Fcgr2a     |
| chr13 | 88249722  | 88250322  | 88249075  | 29132  | Atp1a4     |
| chr13 | 96622608  | 96623288  | 96621421  | 289316 | Lefty2     |
| chr13 | 96987251  | 96987946  | 96984348  | 498301 | Wdr26      |
| chr13 | 99023735  | 99024335  | 99025500  | 289337 | Tlr5       |
| chr14 | 10140785  | 10141385  | 10144321  | 64537  | Hpse       |
| chr14 | 102017601 | 102018721 | 102018125 | 286932 | Vps54      |
| chr14 | 17338187  | 17338787  | 17338758  | 497009 | Naaa       |
| chr14 | 18210047  | 18210647  | 18214004  | 64022  | Btc        |
| chr14 | 3010222   | 3010822   | 3007464   | 305123 | Brdt       |
| chr14 | 37708795  | 37709395  | 37708306  | 305310 | Slain2     |

---

|              |          |          |          |           |              |
|--------------|----------|----------|----------|-----------|--------------|
| chr14        | 42326115 | 42326715 | 42329679 | 360933    | LOC360933    |
| chr14        | 5454401  | 5455001  | 5451584  | 305135    | Lrrc8b       |
| chr14        | 62471157 | 62471757 | 62470889 | 501923    | RGD1565192   |
| chr14        | 83904522 | 83905122 | 83905713 | 305471    | Zfp278       |
| chr14        | 84759189 | 84759789 | 84761365 | 305478    | Rnf215       |
| chr14        | 87000774 | 87001374 | 87001869 | 305502    | Tmed4        |
| chr15        | 22614991 | 22615591 | 22617408 | 289993    | Cdkn3        |
| chr15        | 26854988 | 26855588 | 26852308 | 64523     | Tep1         |
| chr15        | 27348750 | 27349350 | 27347196 | 171114    | Ndrp2        |
| chr15        | 3918438  | 3919038  | 3918086  | 408223    | Usp54        |
| chr15        | 40707189 | 40707789 | 40703967 | 290303    | RGD1306437   |
| chr15_random | 597707   | 598307   | 598165   | 192264    | Ear11        |
| chr16        | 10030537 | 10031137 | 10030513 | 64347     | Sncg         |
| chr16        | 19039705 | 19040305 | 19042062 | 290641    | Rpl18a       |
| chr16        | 19333956 | 19334556 | 19334215 | 364534    | Ssbp4        |
| chr16        | 19425824 | 19426424 | 19425400 | 64156     | Uba52        |
| chr16        | 19609512 | 19610112 | 19609515 | 290659    | Cope         |
| chr16        | 48728728 | 48729328 | 48725513 | 290749    | Irf2         |
| chr16        | 6359722  | 6360322  | 6358767  | 50693     | Itih3        |
| chr16        | 75113768 | 75114368 | 75116871 | 613224    | Defa8        |
| chr17        | 12196904 | 12197504 | 12196629 | 117282    | Hnrnpk       |
| chr17        | 15351908 | 15352508 | 15353097 | 361208    | Rab24        |
| chr17        | 16084231 | 16084831 | 16084777 | 290999    | Higd2a       |
| chr17        | 21188357 | 21188957 | 21185525 | 306808    | Ippk         |
| chr17        | 23817293 | 23817893 | 23819083 | 308173    | Kif13a       |
| chr17        | 32839813 | 32840413 | 32840752 | 291060    | Snrnp48      |
| chr17        | 48513464 | 48514064 | 48513673 | 498753    | RGD1564767   |
| chr17        | 5549357  | 5549957  | 5549458  | 306687    | Hiatl1       |
| chr17        | 83395155 | 83395755 | 83396733 | 361272    | Dhtkd1       |
| chr17        | 90572122 | 90572722 | 90572390 | 361282    | Plxdc2       |
| chr18        | 29154450 | 29155129 | 29153944 | 25433     | Hbegf        |
| chr18        | 29729968 | 29730660 | 29728602 | 394223    | Pcdha11      |
| chr18        | 30150433 | 30151033 | 30150686 | 291653    | Pcdhb6       |
| chr18        | 30670860 | 30671460 | 30669477 | 364845    | Pcdhgb8      |
| chr18        | 71887964 | 71888564 | 71889052 | 291433    | Dym          |
| chr18        | 75051310 | 75051910 | 75048481 | 54301     | Slc14a1      |
| chr18        | 77135010 | 77135610 | 77134655 | 100192205 | LOC100192205 |
| chr18        | 81233561 | 81234161 | 81232949 | 291394    | Cndp2        |
| chr18        | 83307981 | 83308686 | 83306944 | 291388    | Cbln2        |
| chr19        | 11289146 | 11289746 | 11286402 | 117038    | Mt3          |
| chr19        | 20438304 | 20438904 | 20439008 | 94188     | Zfp423       |
| chr19        | 21714297 | 21714897 | 21717140 | 140941    | Siah1a       |
| chr19        | 40870230 | 40870830 | 40873201 | 64442     | St3gal2      |
| chr19        | 45861256 | 45861856 | 45861454 | 54267     | Maf          |
| chr19        | 50464867 | 50465467 | 50465553 | 307907    | RGD1304884   |
| chr19        | 54479100 | 54479700 | 54479960 | 292090    | Galnt2       |
| chr19        | 55935100 | 55935700 | 55939044 | 361443    | RGD1306192   |
| chr20        | 10973196 | 10973796 | 10973422 | 309680    | Dnmt3l       |
| chr20        | 12086996 | 12087596 | 12089172 | 294336    | Pcbp3        |
| chr20        | 1658131  | 1658731  | 1658454  | 414785    | RT1-M6-1     |
| chr20        | 3539070  | 3539670  | 3539612  | 414783    | RT1-CE4      |

---

|       |           |           |           |        |         |
|-------|-----------|-----------|-----------|--------|---------|
| chr20 | 3554455   | 3555135   | 3555613   | 414793 | RT1-CE3 |
| chr20 | 3555556   | 3556156   | 3555613   | 414793 | RT1-CE3 |
| chr20 | 3797372   | 3797972   | 3797594   | 361796 | Bat5    |
| chrX  | 134397140 | 134397818 | 134396762 | 58812  | Apin    |
| chrX  | 25481044  | 25481644  | 25480915  | 363448 | Dynlt3  |
| chrX  | 26711844  | 26712444  | 26710222  | 116695 | Kcnd1   |
| chrX  | 80627745  | 80628345  | 80631374  | 317268 | Arx     |
| chrX  | 94138301  | 94138901  | 94138055  | 303393 | Cox7b   |
| chrX  | 94353841  | 94354441  | 94351923  | 171152 | Taf9b   |

---
