# Supplementary material for: Pesticide Methoxychlor Promotes the Epigenetic Transgenerational Inheritance of Adult-Onset Disease through the Female Germline
Source: PubMed Central journal article supplement (PMC4109920; doi:10.1371/journal.pone.0102091), 2014-07-24
Supplement: pone.0102091.s011.pdf [file pone.0102091.s011.pdf]

## Supplemental Table S8

### Characteristics of the Average Epimutation Clusters and Associated Genes

| Chromosome Cluster | cSTART    | cSTOP     | Epimutation Associated Genes in Cluster                |
|--------------------|-----------|-----------|--------------------------------------------------------|
| chr1               | 77950000  | 81900000  | Qpctl, RGD1565787, Lypd3, Cyp2b1, Cyp2b12              |
| chr1               | 207900000 | 209950000 | Cst6, Mrpl49, Cox8a                                    |
| chr1               | 209650000 | 211800000 | Cox8a, Tut1, Tut1                                      |
| chr3               | 71950000  | 75450000  | Olr636, Olr681, Olr705, Mtch2                          |
| chr3               | 168100000 | 171250000 | Rps21, Ntsr1, Nkain4                                   |
| chr5               | 158750000 | 162550000 | Ddi2, Agmat, Dnajc16                                   |
| chr7               | 8350000   | 10900000  | Zbtb7a, Thop1, Timm13                                  |
| chr7               | 10150000  | 12900000  | Timm13, Apc2, Apc2, Apc2                               |
| chr7               | 115950000 | 119550000 | Slc16a8, Kdelr3, Josd1, Cbx7                           |
| chr7               | 118800000 | 122750000 | Phf5a, Cyp2d4, Cyp2d3, Parvg                           |
| chr7               | 135600000 | 139150000 | Lalba, Ddx23, Wnt1                                     |
| chr9               | 90700000  | 94600000  | Olr1345, Olr1350, Ano7, Dtyrk, Pdcd1                   |
| chr10              | 11700000  | 14200000  | Mefv, Prss27, Dci, Sepx1, Nubp2                        |
| chr10              | 13300000  | 16100000  | Dci, Sepx1, Nubp2, Hn1l, Itfg3                         |
| chr10              | 34200000  | 38400000  | Olr1387, Olr1388, Adamts2, RGD1563273, Col23a1, Sec24a |
| chr10              | 88500000  | 92450000  | Nt5c3l, Dnajc7, Rpl27, Vat1, Tmub2, Hexim1             |
| chr10              | 104950000 | 107950000 | Recql5, RGD1311078, Jmjd6                              |
| chr12              | 41000000  | 44500000  | Sfrs9, Dynll1, RGD1311899                              |
| chr16              | 17450000  | 21250000  | Rpl18a, Ssbp4, Uba52, Cope                             |
| chr18              | 28200000  | 31650000  | Hbegf, Pcdha11, Pcdhb6, Pcdhgb8                        |
| chr20              | 1600000   | 5500000   | RT1-M6-1, RT1-CE4, RT1-CE3, RT1-CE3, Bat5              |

Clusters with the same gene listed more than once indicates multiple epimutations associated with that gene.
